# Supplementary material for: Biaxial negative thermal expansion in carbon nets – graphyne and derivatives
Source: Royal Society of Chemistry journal article supplement (doi:10.1039/d3cp01253k), 2023-01-01
Supplement: d3cp01253k1.pdf [file d3cp01253k1.pdf]

## SUPPORTING INFORMATION

### Biaxial Negative Thermal Expansion in Carbon Nets – Graphyne and Derivatives

Soumya Mondal and Ayan Datta\*

*School of Chemical Sciences, Indian Association for the Cultivation of Science, 2A & 2B Raja S.  
C. Mullick Road, Jadavpur, Kolkata 700032, WB, India*

\*email: [spad@iacs.res.in](mailto:spad@iacs.res.in)

#### Contents

1. **Figure S1.** Visualization of hybridization of carbon atoms in graphynes **(a)** (6,6,12-), **(b)** (14,14,14-), **(c)**  $\alpha$  (18,18,18-), **(d)**  $\beta$  (12,12,12-), **(e)**  $\gamma$  (6,6,6-) and **(f)**  $\delta$  (6,6,14-).
2. **Table ST1.** Table for different graphyne systems showing a negative **TEC**.
3. **Table ST2.** Table for different graphynes showing different types of bonds.
4. **Figure S2.** Energy vs Volume plots for **(a)** (6,6,12-), **(b)** (14,14,14-), **(c)**  $\alpha$  (18,18,18-), **(d)**  $\beta$  (12,12,12-), **(e)**  $\gamma$  (6,6,6-) and **(f)**  $\delta$  (6,6,14-).
5. **Figure. S3.** Phonon band structure shows stability of the 2D systems.
6. POSCARS of the 2D materials.
7. **Figure S4.** **(a)** BGy-HEX **(b)** AlGy-HEX **(c)** GaGy-HEX. Analogues of  $\alpha$ -Graphyne.
8. **Figure S5.** Normalized Area vs Temperature plot for **BGy-HEX**.
9. **Figure S6.** TECs for **(a)** BGy-Hex **(b)** AlGy-Hex **(c)** GaGy-Hex.
10. **Figure S7.** RMSD vs MD time frame plots
11. **Figure. S8.** Standard deviation for the normalized area.

12. **Table ST3.** The standard deviation values at different temperatures.
13. **Table ST4.** Biaxial Negative thermal expansion of different Graphyne materials.
14. **Figure S9.** Visualization of graphene.
15. **Figure S10.** Relative magnitudes for the thermal expansion coefficient of graphene with the graphyne systems.
16. **Figure S11.** Grüneisen parameter vs frequency plot for graphene.
17. **Figure S12.** Visualization of graphdiyne.
18. **Figure S13.** Relative magnitudes for the thermal expansion coefficients in graphdiyne (GDy) with the graphyne systems and other carbon allotropes at room temperature.
19. **Table ST5.** Thermal expansion coefficient values of **(a)** (6,6,12-), **(b)** (14,14,14-), **(c)**  $\alpha$  (18,18,18-), **(d)**  $\beta$  (12,12,12-), **(e)**  $\gamma$  (6,6,6-) **(f)**  $\delta$  (6,6,14-), **(g)** graphene **(h)** GDy (graphdiyne) at room temperature.

**1. Fig. S1.** Hybridized carbon atoms visualization in 2D nets.

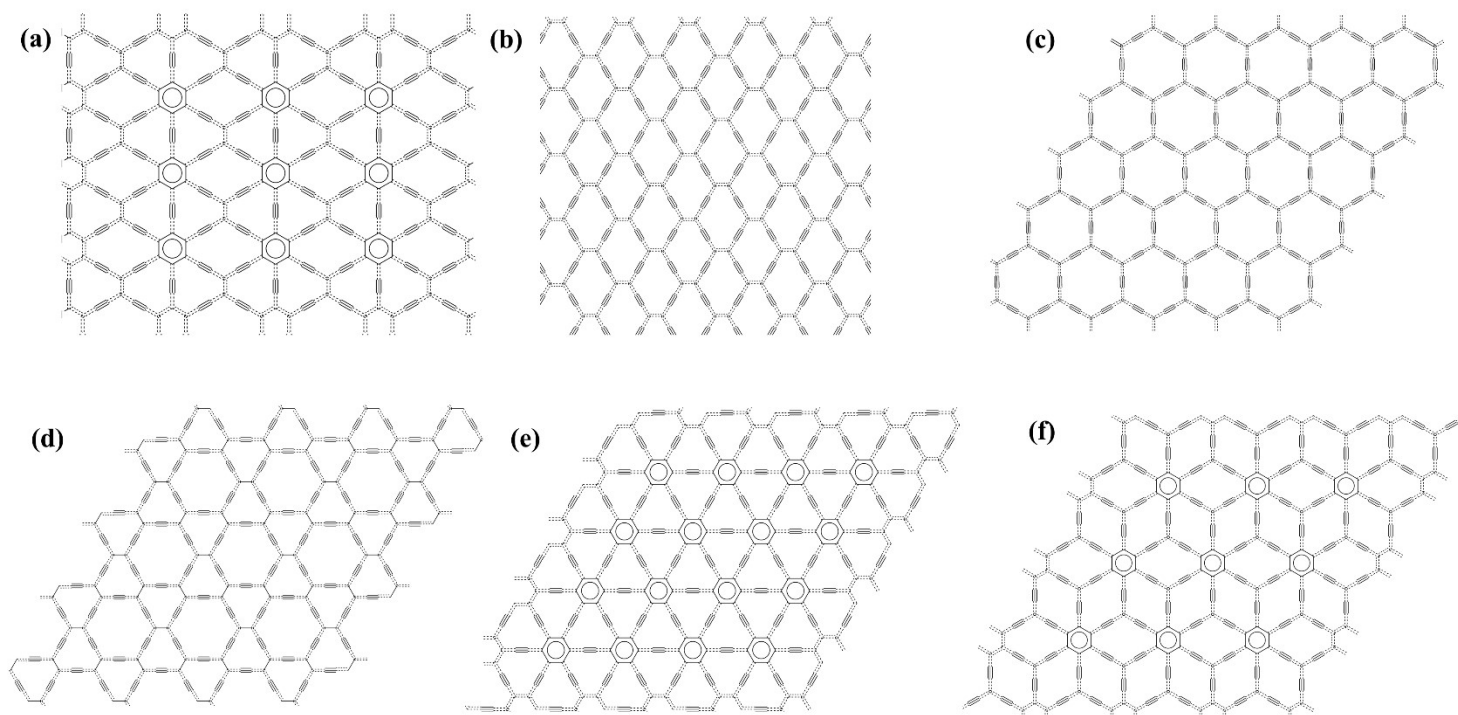

**Figure S1.** Hybridized carbon atoms visualization in (a) (6,6,12-), (b) (14,14,14-), (c)  $\alpha$  (18,18,18-), (d)  $\beta$  (12,12,12-), (e)  $\gamma$  (6,6,6-) and (f)  $\delta$  (6,6,14-).

**2. Table ST1.** Table for different graphyne systems showing a negative TEC.

| <b>Graphynes</b>   | <b>Negative TEC range (K)</b> |
|--------------------|-------------------------------|
| 6,6,12-            | Beyond 1000K                  |
| 14,14,14-          | 800K                          |
| Alpha ( $\alpha$ ) | Beyond 1000K                  |
| Beta ( $\beta$ )   | 710K                          |
| Gamma ( $\gamma$ ) | 950K                          |
| Delta ( $\delta$ ) | Beyond 1000K                  |

Calculations were done till  $T_{\max} = 1000\text{K}$ .

**3. Table ST2.** Table for different graphynes showing different types of bonds

| <b>Graphynes</b> | <b>C(sp)-C(sp)</b> | <b>C(sp<sup>2</sup>)-C(sp<sup>2</sup>)<br/>(Type 1)</b> | <b>C(sp<sup>2</sup>)-C(sp<sup>2</sup>)<br/>(Type 2)</b> | <b>C(sp<sup>2</sup>)-C(sp)<br/>(Type 1)</b> | <b>C(sp<sup>2</sup>)-C(sp)<br/>(Type 2)</b> |
|------------------|--------------------|---------------------------------------------------------|---------------------------------------------------------|---------------------------------------------|---------------------------------------------|
| <b>6,6,12</b>    | 1.226              | 1.431                                                   | 1.425                                                   | 1.397                                       |                                             |
| <b>14,14,14</b>  | 1.229              | 1.448                                                   |                                                         | 1.390                                       |                                             |
| <b>Alpha</b>     | 1.229              |                                                         |                                                         | 1.394                                       |                                             |
| <b>Beta</b>      | 1.231              | 1.457                                                   |                                                         | 1.387                                       |                                             |
| <b>Gamma</b>     | 1.221              | 1.425                                                   |                                                         | 1.406                                       |                                             |
| <b>Delta</b>     | 1.228              | 1.437                                                   |                                                         | 1.388                                       | 1.394                                       |

4. **Fig. S2.** Energy vs volume plots required for thermal properties calculation.

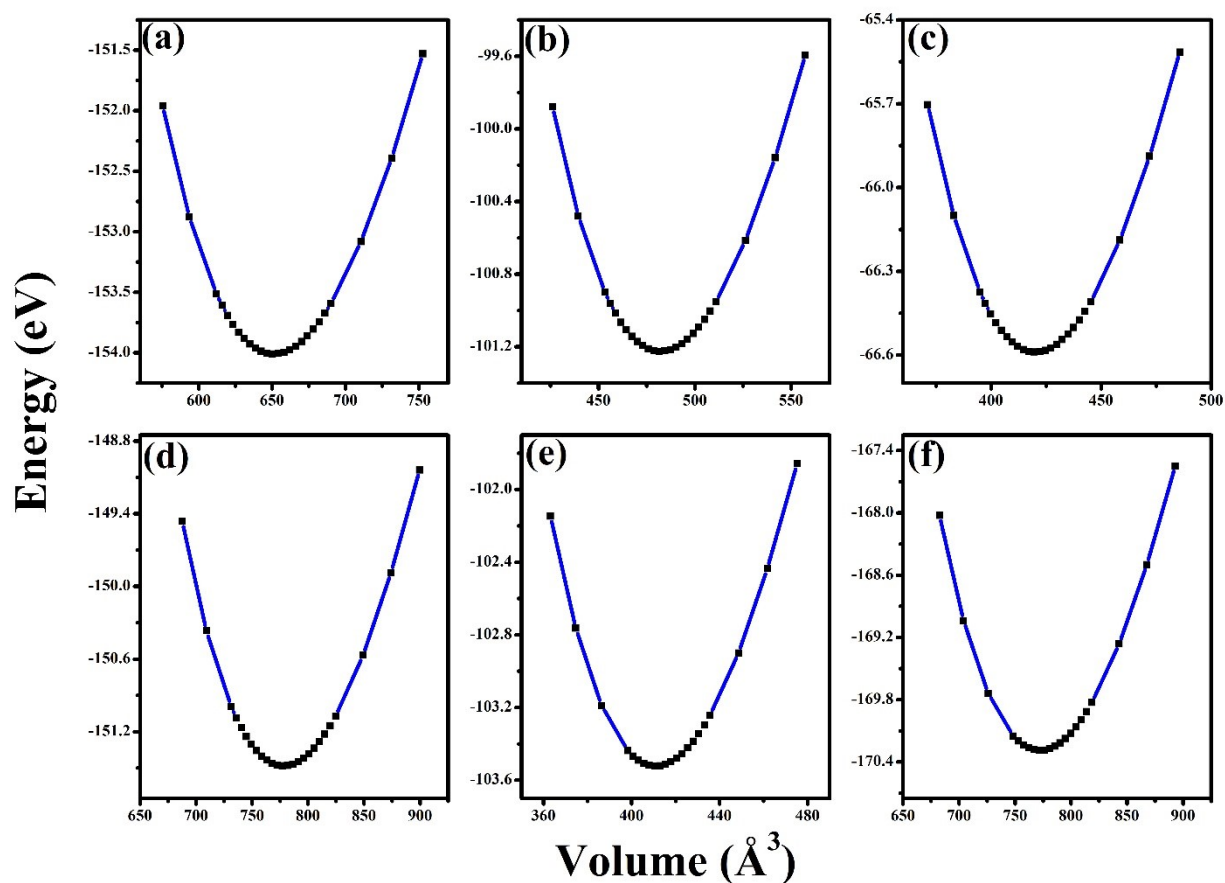

**Figure S2:** Free-energy vs volume plots for (a) (6,6,12-), (b) (14,14,14-), (c)  $\alpha$  (18,18,18-), (d)  $\beta$  (12,12,12-), (e)  $\gamma$  (6,6,6-) and (f)  $\delta$  (6,6,14-).

5. **Fig. S3.** Phonon band structure shows stability of the 2D systems.

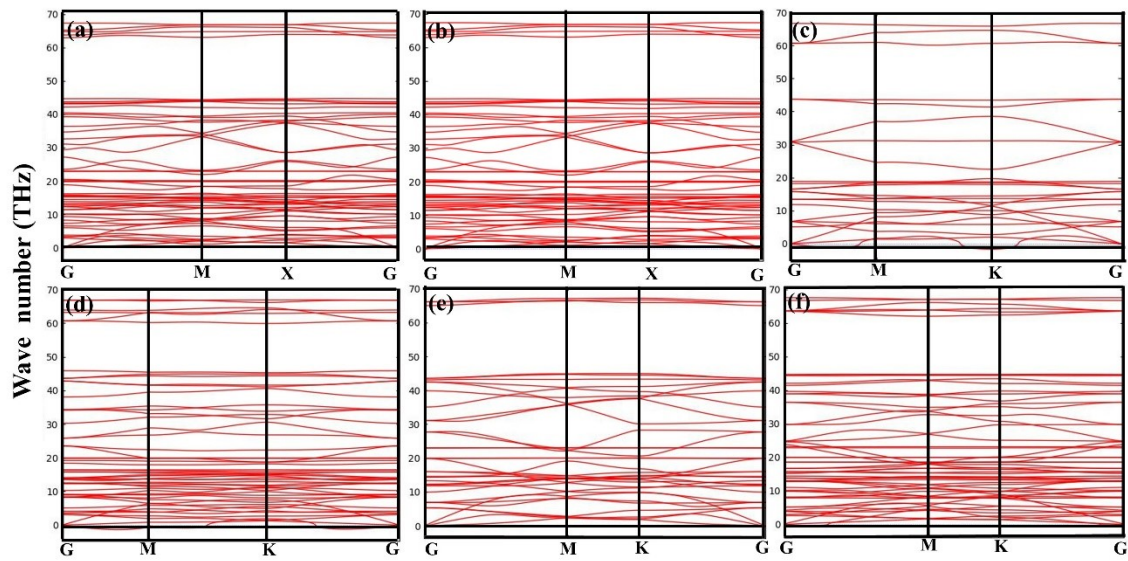

**Figure S3:** Phonon dispersion bands show stability of the structure **(a)** (6,6,12-), **(b)** (14,14,14-), **(c)**  $\alpha$  (18,18,18-), **(d)**  $\beta$  (12,12,12-), **(e)**  $\gamma$  (6,6,6-) and **(f)**  $\delta$  (6,6,14-).

## 6. POSCARS of the 2D materials.

### POSCARS

(a)

6,6,12

1.000

|                     |                    |                     |
|---------------------|--------------------|---------------------|
| 9.4271667524014706  | 0.0000000000000002 | 0.0000000000000000  |
| -0.0000000000000000 | 6.8981955867425802 | 0.0000000000000000  |
| 0.0000000000000000  | 0.0000000000000000 | 10.0000000000000000 |

C

18

Direct

|                    |                    |                    |
|--------------------|--------------------|--------------------|
| 0.8690582460326451 | 0.8958567441619639 | 0.5000000000000000 |
| 0.1309417539673544 | 0.1041432558380350 | 0.5000000000000000 |
| 0.1309417539673544 | 0.8958567441619639 | 0.5000000000000000 |
| 0.8690582460326451 | 0.1041432558380350 | 0.5000000000000000 |
| 0.2592161817490509 | 0.2055606248952588 | 0.5000000000000000 |
| 0.7407838182509487 | 0.7944393751047414 | 0.5000000000000000 |
| 0.7407838182509487 | 0.2055606248952588 | 0.5000000000000000 |
| 0.2592161817490509 | 0.7944393751047414 | 0.5000000000000000 |
| 0.5000000000000000 | 0.6037338793575838 | 0.5000000000000000 |
| 0.5000000000000000 | 0.3962661206424153 | 0.5000000000000000 |
| 0.6278563803015278 | 0.2936757788500661 | 0.5000000000000000 |
| 0.3721436196984722 | 0.7063242211499342 | 0.5000000000000000 |
| 0.3721436196984722 | 0.2936757788500661 | 0.5000000000000000 |
| 0.6278563803015278 | 0.7063242211499342 | 0.5000000000000000 |

0.0000000000000000 0.2074092193736203 0.5000000000000000  
0.0000000000000000 0.7925907806263796 0.5000000000000000  
0.0000000000000000 0.4114039429882726 0.5000000000000000  
0.0000000000000000 0.5885960570117275 0.5000000000000000

**(b)**

14,14,14

1.0000000000000000

6.9646204389481561 0.0000000000000003 0.0000000000000000  
-0.0000000000000003 6.9139516066262923 0.0000000000000000  
0.0000000000000000 0.0000000000000000 10.0000000000000000

C

12

Direct

0.5445714632838077 0.4232793896600577 0.5000000000000000  
0.4554285367161918 0.5767206103399419 0.5000000000000000  
0.9554285367161923 0.4232793896600577 0.5000000000000000  
0.0445714632838082 0.5767206103399419 0.5000000000000000  
0.3539678493014367 0.7500004960090529 0.5000000000000000  
0.6460321506985630 0.2499995039909462 0.5000000000000000  
0.1460321506985634 0.7500004960090529 0.5000000000000000  
0.8539678493014370 0.2499995039909462 0.5000000000000000  
0.0445768529185766 0.9232816320557032 0.5000000000000000  
0.9554231470814230 0.0767183679442976 0.5000000000000000  
0.4554231470814238 0.9232816320557032 0.5000000000000000  
0.5445768529185770 0.0767183679442976 0.5000000000000000

**(c)**

alpha

1.

-3.4806940398795039 6.0282976565876591 0.0000000000000000  
-6.9610047190400426 0.0002218122655804 0.0000000000000000  
0.0000000000000000 0.0000000000000000 10.0000000000000000

C

8

Direct

0.6666594678622411 0.6666594679848559 0.5000000000000000  
0.3333405321377595 0.3333405320151435 0.5000000000000000  
0.4490179205247912 0.4490169204972826 0.5000000000000000  
0.5509715714013934 0.8980304038068082 0.5000000000000000



0.1019695963048948 0.4490284285310064 0.5000000000000000  
0.5509820794752087 0.5509830795027172 0.5000000000000000  
0.4490284285986065 0.1019695961931918 0.5000000000000000  
0.8980304036951062 0.5509715714689936 0.5000000000000000

**(d)**

beta

1.

4.7360247716038053 8.2030333740699835 -0.0000000000000000  
-4.7360247716038053 8.2030333740699835 -0.0000000000000000  
0.0000000000000000 0.0000000000000000 10.0000000000000000

C

18

Direct

0.7239027157887824 0.8539093663111416 0.5000000000000000  
0.1460906336920166 0.5778100820978254 0.5000000000000000  
0.4221899179032365 0.7239027157866865 0.5000000000000000  
0.2760972842112179 0.1460906336888588 0.5000000000000000  
0.8539093663079833 0.4221899179021745 0.5000000000000000  
0.5778100820967615 0.2760972842133134 0.5000000000000000  
0.8539093663111416 0.7239027157887824 0.5000000000000000  
0.2760972842133134 0.5778100820967615 0.5000000000000000  
0.4221899179021746 0.8539093663079833 0.5000000000000000  
0.1460906336888588 0.2760972842112179 0.5000000000000000  
0.7239027157866866 0.4221899179032365 0.5000000000000000  
0.5778100820978254 0.1460906336920166 0.5000000000000000  
0.4230544953802079 0.5769455046197917 0.5000000000000000  
0.4230544953770726 -0.0000000000031351 0.5000000000000000  
-0.0000000000031351 0.4230544953770725 0.5000000000000000  
0.5769455046197914 0.4230544953802079 0.5000000000000000  
0.5769455046229277 0.0000000000031351 0.5000000000000000  
0.0000000000031351 0.5769455046229277 0.5000000000000000

**(e)**

gamma

1.

3.4421820432063441 5.9620358095904313 0.0000000000000000  
-6.8845582108901695 0.0001114159548589 0.0000000000000000  
0.0000000000000000 0.0000000000000000 10.0000000000000000

C

12

Direct

|                     |                    |                    |
|---------------------|--------------------|--------------------|
| 0.7930076869094723  | 0.0000029999965364 | 0.5000000000000000 |
| 0.0000050262357737  | 0.7930130180561835 | 0.5000000000000000 |
| 0.2069950081792522  | 0.2069929819416107 | 0.5000000000000000 |
| 0.7930069918207500  | 0.7930130180583880 | 0.5000000000000000 |
| 0.2069953130905271  | 0.0000030000034626 | 0.5000000000000000 |
| -0.0000020262357741 | 0.2069929819438154 | 0.5000000000000000 |
| 0.4112803979674287  | 0.0000029999993803 | 0.5000000000000000 |
| -0.0000059883407783 | 0.4112787327096286 | 0.5000000000000000 |
| 0.5887182789531307  | 0.5887262672961298 | 0.5000000000000000 |
| 0.4112847210468684  | 0.4112787327038721 | 0.5000000000000000 |
| 0.5887226020325712  | 0.0000030000006188 | 0.5000000000000000 |
| 0.0000089883407779  | 0.5887262672903728 | 0.5000000000000000 |

**(f)**

delta

1.

|                     |                     |                     |
|---------------------|---------------------|---------------------|
| 9.4379390822686720  | -0.0002649031811799 | 0.0000000000000000  |
| -4.7191991039962060 | 8.1733627052312396  | 0.0000000000000000  |
| 0.0000000000000000  | 0.0000000000000000  | 10.0000000000000000 |

C

20

Direct

|                    |                    |                    |
|--------------------|--------------------|--------------------|
| 0.2479694561395410 | 0.4960115373027623 | 0.5000000000000000 |
| 0.5039895873323368 | 0.7519976927319558 | 0.5000000000000000 |
| 0.2480035477221697 | 0.7520209268554863 | 0.5000000000000000 |
| 0.7520209268551472 | 0.2480035477218417 | 0.5000000000000000 |
| 0.7519966927317315 | 0.5039885873320820 | 0.5000000000000000 |
| 0.4960115373024710 | 0.2479694561392838 | 0.5000000000000000 |
| 0.1728325983050894 | 0.3456675271388799 | 0.5000000000000000 |
| 0.6543325337001911 | 0.8271627190199241 | 0.5000000000000000 |
| 0.1728253090523797 | 0.8271785095274382 | 0.5000000000000000 |
| 0.8271805095271396 | 0.1728273090520701 | 0.5000000000000000 |
| 0.8271627190202880 | 0.6543325337008460 | 0.5000000000000000 |
| 0.3456685271395762 | 0.1728335983054705 | 0.5000000000000000 |
| 0.0879037670601799 | 0.9120968562292792 | 0.5000000000000000 |
| 0.0879156571764941 | 0.1758198948213042 | 0.5000000000000000 |
| 0.8241822703896071 | 0.9120869262146953 | 0.5000000000000000 |
| 0.9120869262147469 | 0.8241822703897435 | 0.5000000000000000 |
| 0.1758198948214758 | 0.0879156571765707 | 0.5000000000000000 |
| 0.9120988562292609 | 0.0879057670601676 | 0.5000000000000000 |
| 0.3333198923220006 | 0.6666787909585861 | 0.5000000000000000 |
| 0.6666787909581795 | 0.3333198923216016 | 0.5000000000000000 |

**(g)**

B-GY-Hex.

1.0000000000000000  
7.3985768927001310 0.0000058864104552 0.0000000000000000  
3.6992925599641975 6.4073541688052842 0.0000000000000000  
0.0000000000000000 0.0000000000000000 10.0000000000000000

C B  
6 2

Direct

0.5480051837482589 0.9039797381042334 0.5000000000000000  
0.5480167961658137 0.5480056294028631 0.5000000000000000  
0.4519939647686109 0.4519868456339889 0.5000000000000000  
0.4519870622138260 0.0960215522336111 0.5000000000000000  
0.9039797215650441 0.5480164499593383 0.5000000000000000  
0.0960215707594674 0.4519941174178072 0.5000000000000000  
0.3333342484097408 0.3333342143072284 0.5000000000000000  
0.6666672793638893 0.6666673221597982 0.5000000000000000

**(h)**

Al-GY-Hex.

1.0000000000000000  
8.7292510320336536 0.0000399583282936 0.0000000000000000  
4.3647179555265385 7.5598209048815503 0.0000000000000000  
0.0000000000000000 0.0000000000000000 10.0000000000000000

C Al  
6 2

Direct

0.4591962865857292 0.0816078486538355 0.5000000000000000  
0.4591898664767544 0.4591919082530335 0.5000000000000000  
0.5407974684911886 0.5408068509427233 0.5000000000000000  
0.5408028012315087 0.9183850125660149 0.5000000000000000  
0.0816089709949422 0.4591876019746850 0.5000000000000000  
0.9183841353760663 0.5407995058120216 0.5000000000000000  
0.3333330652406348 0.3333286985048345 0.5000000000000000  
0.6666603648335161 0.6666642778206753 0.5000000000000000

**(i)**

Ga-GY-Hex.

1.0000000000000000  
8.7876692321278949 -0.0000019610212960 0.0000000000000000  
4.3938341899755695 7.6103522914667696 0.0000000000000000  
0.0000000000000000 0.0000000000000000 10.0000000000000000

C Ga

6 2

Direct

|                    |                    |                    |
|--------------------|--------------------|--------------------|
| 0.4596041182239771 | 0.0807581226457835 | 0.5000000000000000 |
| 0.4596124596528161 | 0.4596053424620033 | 0.5000000000000000 |
| 0.5403754259025234 | 0.5403748192655542 | 0.5000000000000000 |
| 0.5403738607923467 | 0.9192257284507722 | 0.5000000000000000 |
| 0.0807582698624911 | 0.4596115767332606 | 0.5000000000000000 |
| 0.9192258758667919 | 0.5403741527713094 | 0.5000000000000000 |
| 0.3333252353095594 | 0.3333255382564111 | 0.5000000000000000 |
| 0.6666589394242616 | 0.6666583919345664 | 0.5000000000000000 |

7. **Figure S4.** (a) BGy-HEX (b) AlGy-HEX (c) GaGy-HEX. Analogues of  $\alpha$ -Graphyne.

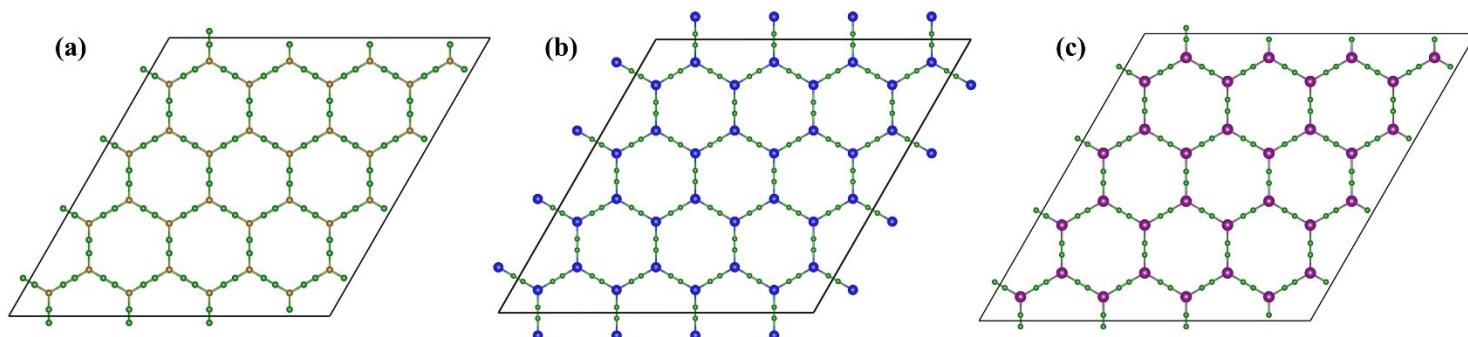

8. **Figure S5.** Normalized Area vs Temperature plot for **BGy-HEX**.

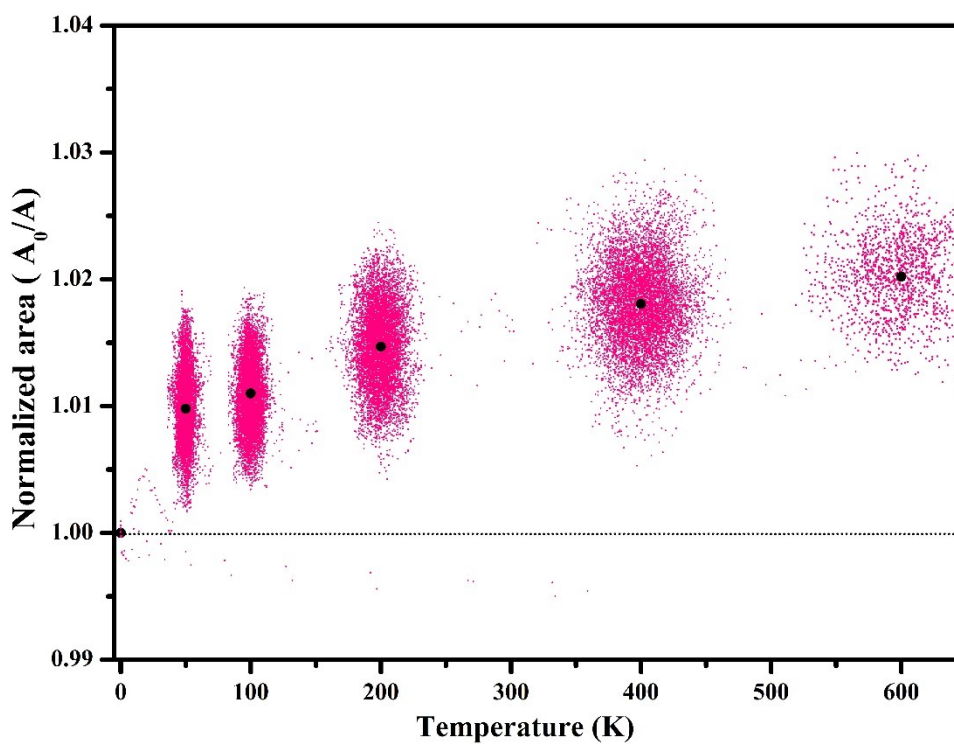

**Figure S5.** Normalized area for **BGy-HEX** (Boron substituted  $\alpha$ -Gy) with pink and black dots represent the normalized and average normalized area.

Supercell with  $\sim 300$  atoms couldn't capture NTE. We expect a bigger cell would give a perfect matchable result with that of the obtained result from *qha-approximation*.

9. **Figure S6.** TECs for (a) BGy-Hex (b) AlGy-Hex (c) GaGy-Hex.

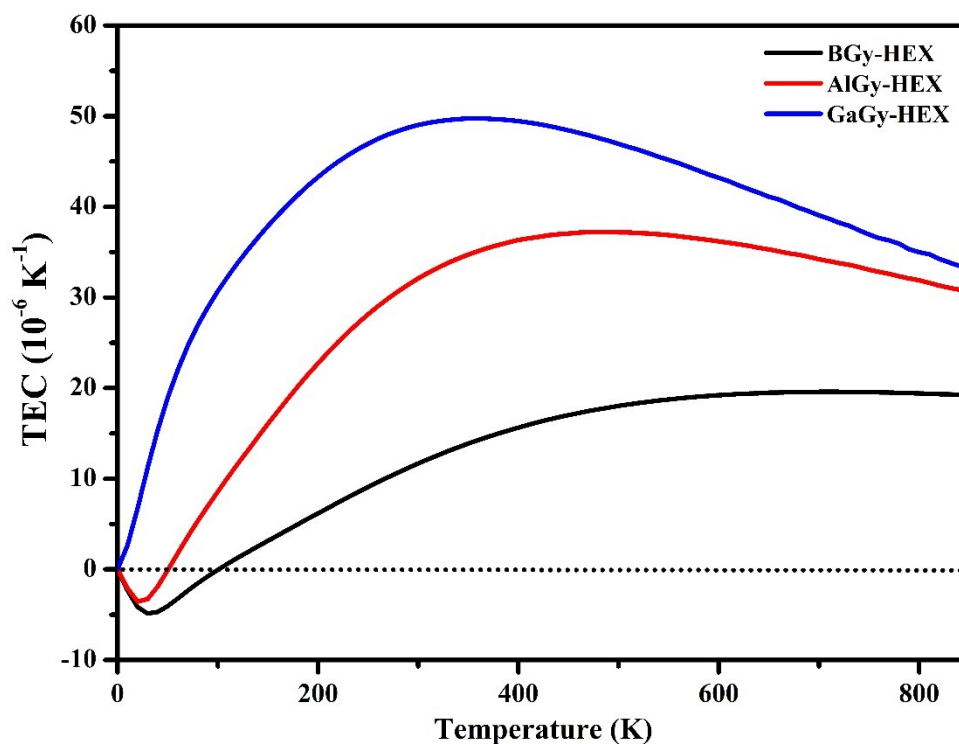

**Figure S6.** TEC upto our calculated temperature (a) BGy-HEX, (b) AlGy-HEX, (c) GaGy-HEX.

BGy-HEX, AlGy-HEX show NTE upto 100K and 50K respectively. GaGy-HEX doesn't show negative TEC at all.

10. Fig. S7. RMSD vs MD time frame plots

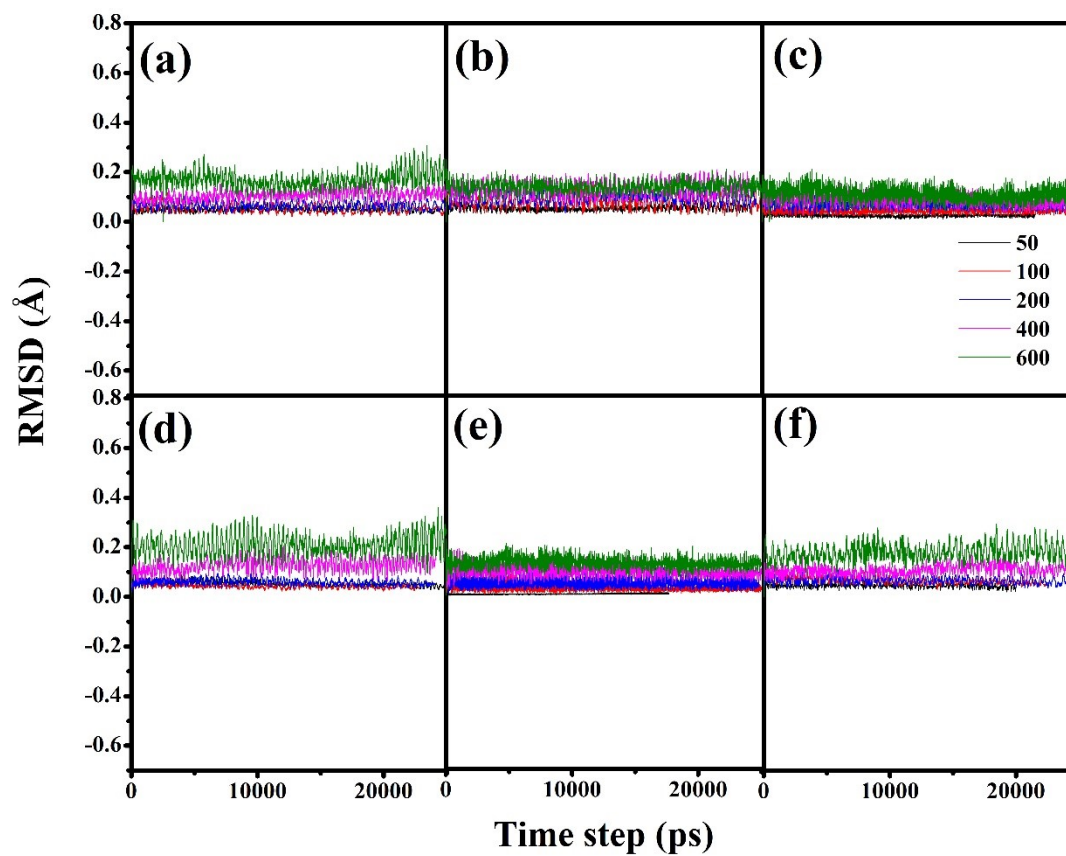

**Figure S7.** RMSD vs MD time frame plots showing stability of the structure **(a)** (6,6,12-), **(b)** (14,14,14-), **(c)**  $\alpha$  (18,18,18-), **(d)**  $\beta$  (12,12,12-), **(e)**  $\gamma$  (6,6,6-) and **(f)**  $\delta$  (6,6,14-).

11. Fig. S8. Standard deviation for the normalized area.

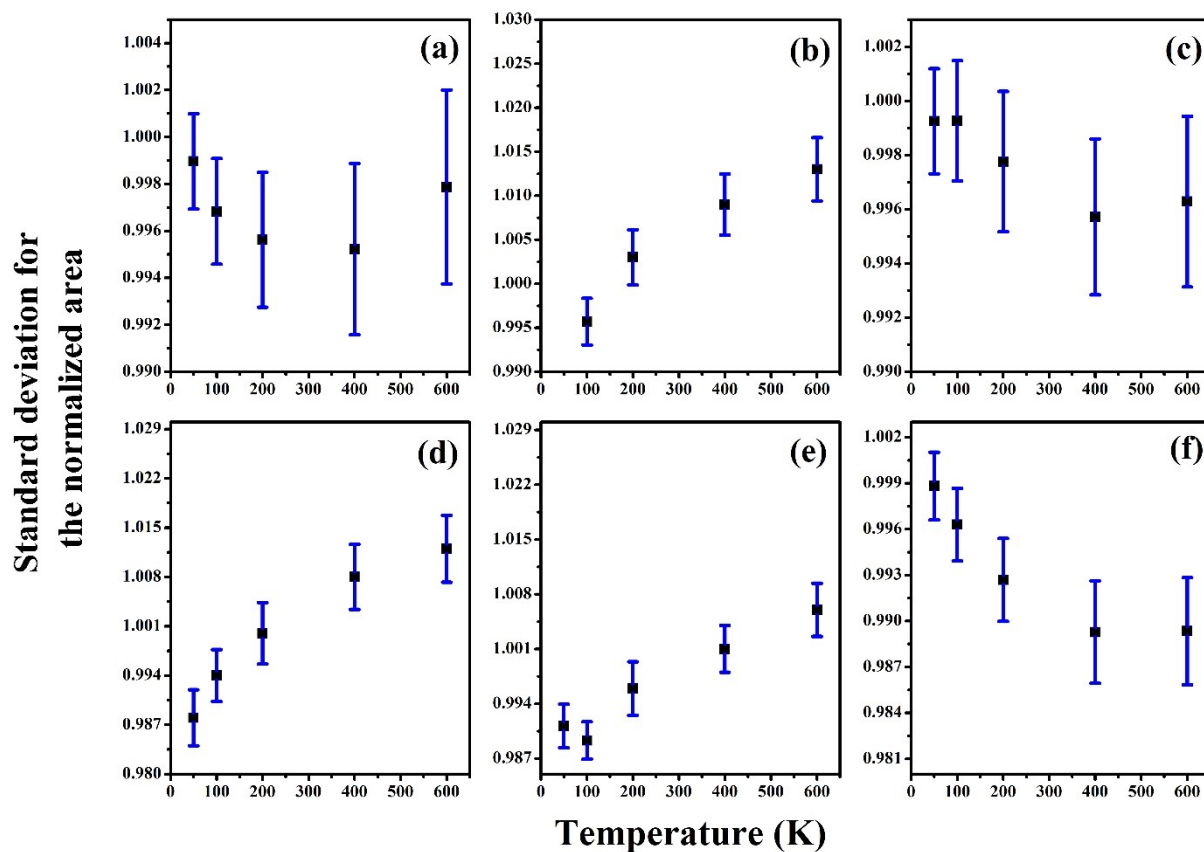

Figure S8. The standard deviation plots for Normalized area vs Temperature for (a)  $(6,6,12-)$ , (b)  $(14,14,14-)$ , (c)  $\alpha (18,18,18-)$ , (d)  $\beta (12,12,12-)$ , (e)  $\gamma (6,6,6-)$  and (f)  $\delta (6,6,14-)$ .

12. Table ST3. The standard deviation values at different temperatures.

| Temperature          | 50K     | 100K    | 200K    | 400K    | 600K    |
|----------------------|---------|---------|---------|---------|---------|
| $6,6,12-$            | 0.00203 | 0.00225 | 0.00287 | 0.00365 | 0.00413 |
| $14,14,14-$          | 0.00275 | 0.00266 | 0.00314 | 0.00347 | 0.00360 |
| $\alpha (18,18,18-)$ | 0.00194 | 0.00222 | 0.00259 | 0.00288 | 0.00315 |
| $\beta (12,12,12-)$  | 0.00398 | 0.00368 | 0.00436 | 0.00462 | 0.00476 |
| $\gamma (6,6,6-)$    | 0.00279 | 0.00239 | 0.00342 | 0.003   | 0.00339 |
| $\delta (6,6,14-)$   | 0.00221 | 0.00237 | 0.00271 | 0.00335 | 0.00350 |



**13. Table ST4.** Biaxial Negative thermal expansion of different Graphyne materials.

1. 6,6,12- Gy

| <b>Temperature (K)</b> | <b>x (Å)</b> | <b>y (Å)</b> |
|------------------------|--------------|--------------|
| 0                      | 35.2404      | 24.7312      |
| 50                     | 35.2398      | 24.7309      |
| 100                    | 35.2401      | 24.7301      |
| 200                    | 35.2386      | 24.7295      |
| 400                    | 35.1868      | 24.7303      |
| 600                    | 35.1788      | 24.7264      |

2. 14,14,14- Gy

| <b>Temperature (K)</b> | <b>x (Å)</b> | <b>y (Å)</b> |
|------------------------|--------------|--------------|
| 0                      | 30.7207      | 33.5166      |
| 50                     | 30.7186      | 33.5155      |
| 100                    | 30.72        | 33.5166      |
| 200                    | 30.7251      | 33.5182      |
| 400                    | 30.7212      | 33.5191      |
| 600                    | 30.7245      | 33.5193      |

3.  $\alpha$  (18,18,18-) Gy

| <b>Temperature (K)</b> | <b>x (Å)</b> | <b>y (Å)</b> |
|------------------------|--------------|--------------|
| 0                      | 34.808       | 34.818       |
| 50                     | 34.815       | 34.8076      |
| 100                    | 34.8103      | 34.8056      |
| 200                    | 34.8114      | 34.8099      |
| 400                    | 34.8125      | 34.8112      |
| 600                    | 34.8178      | 34.8112      |

4.  $\beta$  (12,12,12-) Gy

| <b>Temperature (K)</b> | <b>x (Å)</b> | <b>y (Å)</b> |
|------------------------|--------------|--------------|
| 0                      | 28.4162      | 28.4162      |
| 50                     | 28.4108      | 28.416       |
| 100                    | 28.415       | 28.4105      |
| 200                    | 28.4162      | 28.4158      |
| 400                    | 28.4178      | 28.4162      |
| 600                    | 28.418       | 28.4171      |

5.  $\gamma$  (6,6,6-) Gy

| <b>Temperature (K)</b> | <b>x (Å)</b> | <b>y (Å)</b> |
|------------------------|--------------|--------------|
| 0                      | 33.0415      | 31.6168      |
| 50                     | 33.0418      | 31.6127      |
| 100                    | 33.0416      | 31.6157      |
| 200                    | 33.0416      | 31.6172      |
| 400                    | 33.0411      | 31.6127      |
| 600                    | 33.0401      | 31.7916      |

6.  $\delta$  (6,6,14-) Gy

| <b>Temperature (K)</b> | <b>x (Å)</b> | <b>y (Å)</b> |
|------------------------|--------------|--------------|
| 0                      | 28.3416      | 28.283       |
| 50                     | 28.3113      | 28.3112      |
| 100                    | 28.3111      | 28.31        |
| 200                    | 28.309       | 28.304       |
| 400                    | 28.316       | 28.301       |
| 600                    | 28.3083      | 31.319       |

14. **Figure S9.** Visualization of graphene.

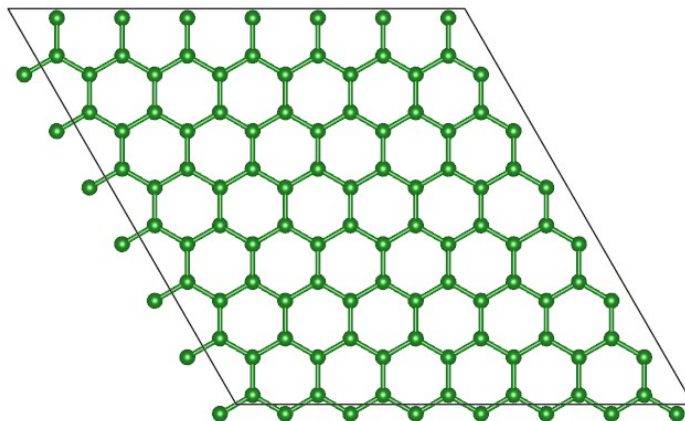

15. **Figure S10.** Relative magnitudes for the thermal expansion coefficient of graphene with the graphyne systems.

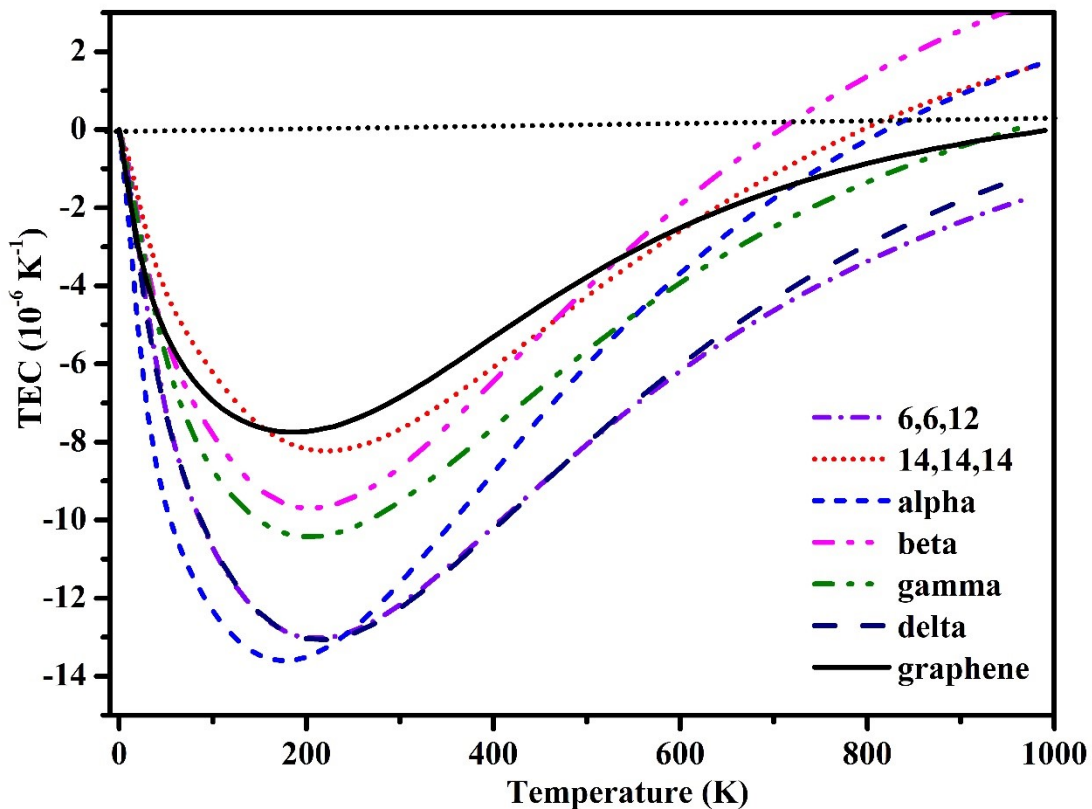

**Figure S10.** *Thermal expansion coefficient of (a) (6,6,12-), (b) (14,14,14-), (c)  $\alpha$  (18,18,18-), (d)  $\beta$  (12,12,12-), (e)  $\gamma$  (6,6,6-) and (f)  $\delta$  (6,6,14-) (g) graphene.*

Graphene the two-dimensional Carbon allotrope, is one of the first two-dimensional sheet that showed the Negative thermal expansion, is evident in innumerable research articles. The negative thermal expansion of graphene arises from the rigid unit modes. The thermal expansion coefficient for the lowest acoustic mode in graphene exhibits negative values at low temperatures, indicating an unusual behavior. This phenomenon arises because, at lower temperatures, only the lower acoustic modes are thermally excited. Consequently, the unique characteristics of these modes contribute to the observed negative thermal expansion coefficient in graphene. The temperature variation of the Grüneisen parameter which is mainly responsible for the negative values of the TECs are negative for acoustic modes (ZA, TA, LA) till 20 THz (See supporting information file **Figure S11**).

Several research articles have already proven the high ductility and NTE of graphene till 1000K. But, 14,14,14, alpha and beta Gys start showing positive thermal expansion much before 1000K.

16. **Figure S11** Grüneisen parameter vs frequency plot for graphene.

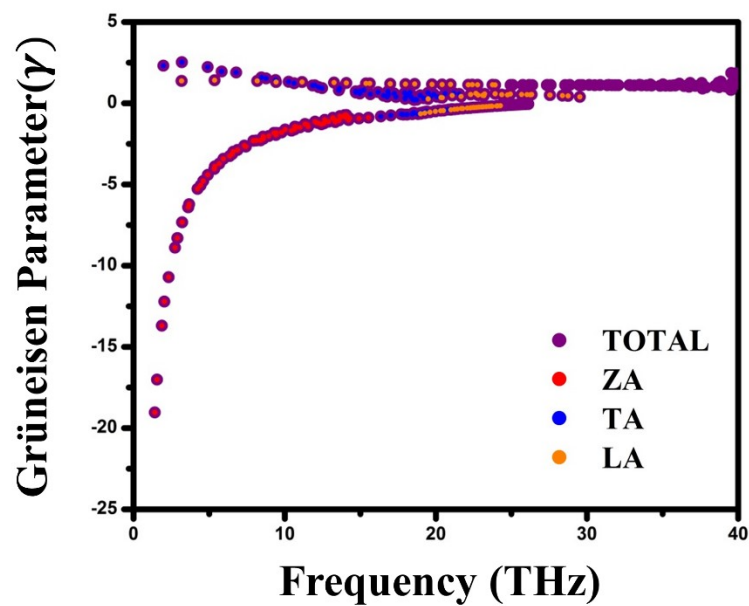

**Figure S11** Grüneisen parameter vs frequency plot for graphene.

17. **Figure S12.** Visualization of graphdiyne.

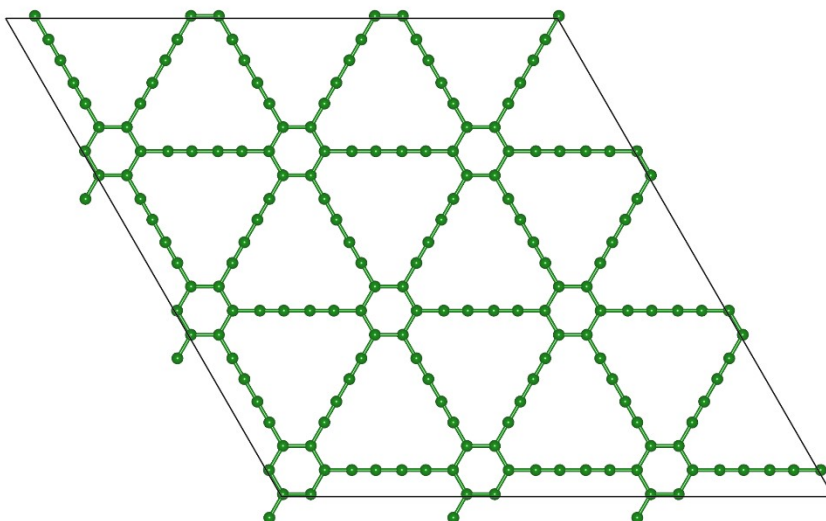

**18. Figure S13.** Relative magnitudes for the thermal expansion coefficients in graphdiyne (GDy) with the graphyne systems and other carbon allotropes at room temperature.

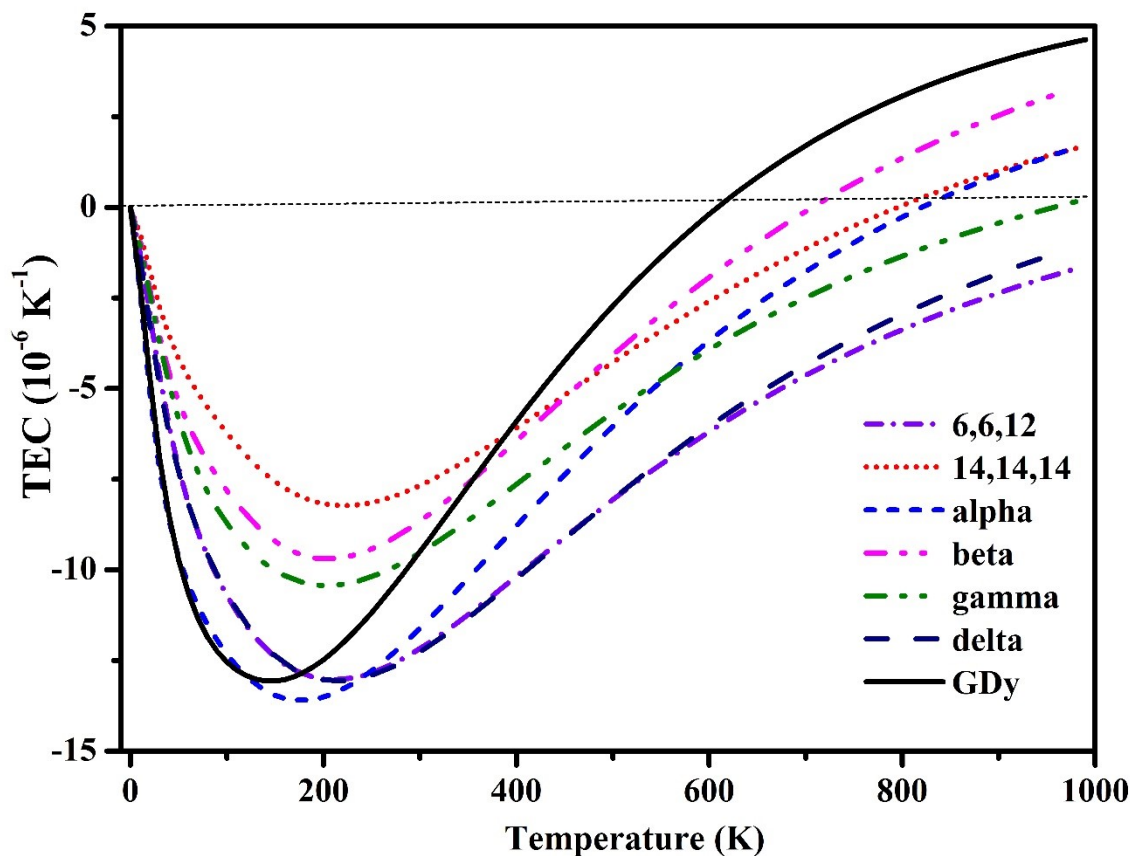

**Figure S13.** Thermal expansion coefficient of (a) (6,6,12-), (b) (14,14,14-), (c)  $\alpha$  (18,18,18-), (d)  $\beta$  (12,12,12-), (e)  $\gamma$  (6,6,6-) and (f)  $\delta$  (6,6,14-) (g) GDy (Graphdiyne).

The mechanical property of graphdiyne is similar to graphyne<sup>3-5</sup>, i.e. it is brittle in nature, which makes it attain PTE at lower temperature. GDy has 5 different types of bond connectivities ( sp-sp-sp-sp, sp<sup>2</sup>-sp<sup>2</sup>-sp<sup>2</sup>-sp<sup>2</sup>, sp<sup>2</sup>-sp<sup>2</sup>-sp-sp, sp-sp<sup>2</sup>-sp<sup>2</sup>-sp, and sp<sup>2</sup>-sp<sup>2</sup>-sp<sup>2</sup>-sp) which is highest among Gy family making it most anharmonic and shoots up the NTE value.

**19. Table ST5.** Thermal expansion coefficient (TEC) values of **(a)** (6,6,12-), **(b)** (14,14,14-), **(c)**  $\alpha$  (18,18,18-), **(d)**  $\beta$  (12,12,12-), **(e)**  $\gamma$  (6,6,6-) **(f)**  $\delta$  (6,6,14-), **(g)** **(h)** GDy (graphdiyne) at room temperature (r.t).

| 2D Carbon allotropes | TEC values at r.t ( $10^{-6} \text{ K}^{-1}$ ) |
|----------------------|------------------------------------------------|
| (6,6,12-)            | -4.59013                                       |
| (14,14,14-)          | -2.71835                                       |
| $\alpha$ (18,18,18-) | -7.19711                                       |
| $\beta$ (12,12,12-)  | -3.52966                                       |
| $\gamma$ (6,6,6-)    | -3.68903                                       |
| $\delta$ (6,6,14-)   | -4.87272                                       |
| graphene             | -3.93952                                       |
| GDy (graphdiyne)     | -6.86171                                       |

1. M. Asadpour, S. Malakpour, M. Faghihnasiri and B. Taghipour, Mechanical properties of two-dimensional graphyne sheet, analogous system of BN sheet and graphyne-like BN sheet, *Solid State Commun.*, 2015, **212**, 46–52.
2. R. Majidi, Mechanical properties of novel forms of graphyne under strain: A density functional theory study, *Physica E*, 2017, **90**, 189–193.
3. Y. Pei, Mechanical properties of graphdiyne sheet, *Physica B Condens. Matter*, 2012, **407**, 4436–4439.
4. M. Ghorbanzadeh Ahangari, Effect of defect and temperature on the mechanical and electronic properties of graphdiyne: A theoretical study, *Physica E*, 2015, **66**, 140–147.
5. X. Gao, H. Liu, D. Wang and J. Zhang, Graphdiyne: synthesis, properties, and applications, *Chem. Soc. Rev.*, 2019, **48**, 908–936.
